# Supplementary material for: Soluble Transferrin Receptor as Iron Deficiency Biomarker: Impact on Exercise Capacity in Heart Failure Patients
Source: MDPI journal article supplement (doi:10.3390/jpm13081282), 2023-08-21
Supplement: s1 [file s1]

**Table S1.** Mean±SD sTfR levels and p-values according to impaired vs preserved submaximal exercise capacity (defined as 6MWT distance <300 meters), and according to impaired vs preserved global QoL (overall summary score of the Minnesota Living with Heart Failure Questionnaire ≥upper tertile)

|                            | Submaximal exercise capacity                   |                                   |         |
|----------------------------|------------------------------------------------|-----------------------------------|---------|
|                            | Preserved submaximal exercise capacity (n=111) | Impaired exercise capacity (n=91) | P-value |
| sTfR levels, mean (SD)     | 1.32 (0.61)                                    | 1.53 (0.72)                       | p=0.030 |
|                            | Quality of Life                                |                                   |         |
|                            | Preserved QoL (n=137)                          | Impaired QoL (n=69)               | P-value |
| <b>Overall score</b>       |                                                |                                   |         |
| sTfR levels, mean (SD)     | 1.38 (0.61)                                    | 1.53 (0.77)                       | p=0.151 |
| <b>Physical dimension</b>  |                                                |                                   |         |
| sTfR levels, mean (SD)     | 1.43 (0.74)                                    | 1.44 (0.42)                       | p=0.846 |
| <b>Emotional dimension</b> |                                                |                                   |         |
| sTfR levels, mean (SD)     | 1.37 (0.61)                                    | 1.55 (0.78)                       | p=0.058 |
| <b>Social dimension</b>    |                                                |                                   |         |
| sTfR levels, mean (SD)     | 1.37 (0.60)                                    | 1.55 (0.79)                       | p=0.067 |

**Table S2.** Adjusted GAM models to explore the parametric and non-parametric associations between sTfR and submaximal exercise capacity (distance walked in the 6MWT in meters) and QoL scores.

|                                                                          | Log (sTfR)         |                        |
|--------------------------------------------------------------------------|--------------------|------------------------|
| Dependent variables                                                      | Parametric p-value | Non-parametric p-value |
| Submaximal exercise capacity                                             |                    |                        |
| Distance walked in the 6 minutes walking test (meters)                   | <0.001             | 0.138                  |
| Quality of Life measured with the Minnesota Living with HF Questionnaire |                    |                        |
| Overall summary score (Global QoL)                                       | 0.006              | 0.615                  |
| Physical dimension                                                       | 0.002              | 0.398                  |
| Emotional dimension                                                      | 0.061              | 0.596                  |
| Social dimension                                                         | 0.418              | 0.548                  |

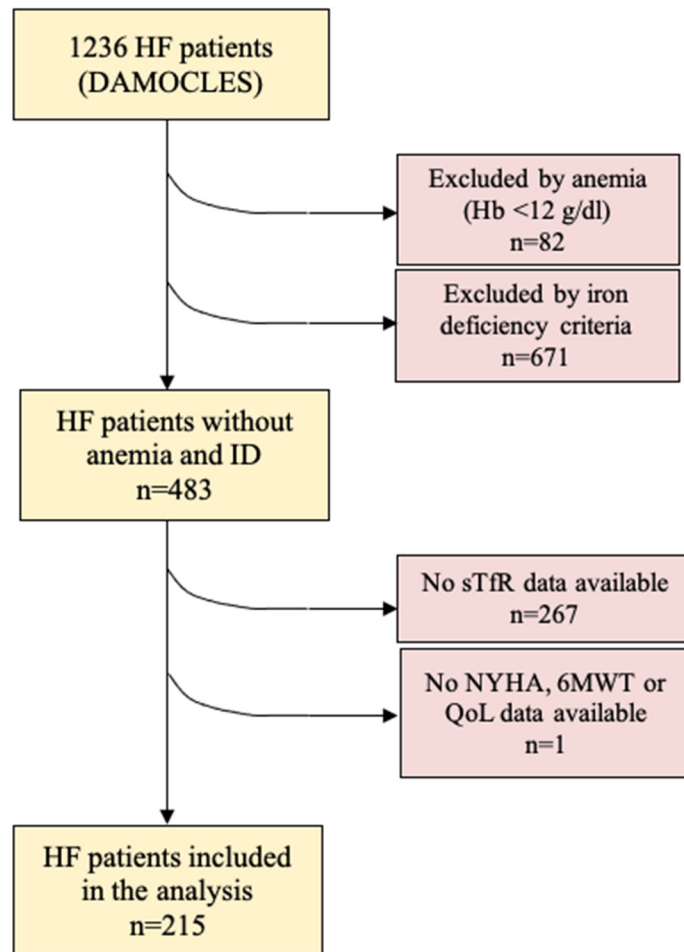

**Figure S1.** Patient flow diagram of the enrolment in the DAMOCLES study for present analysis.

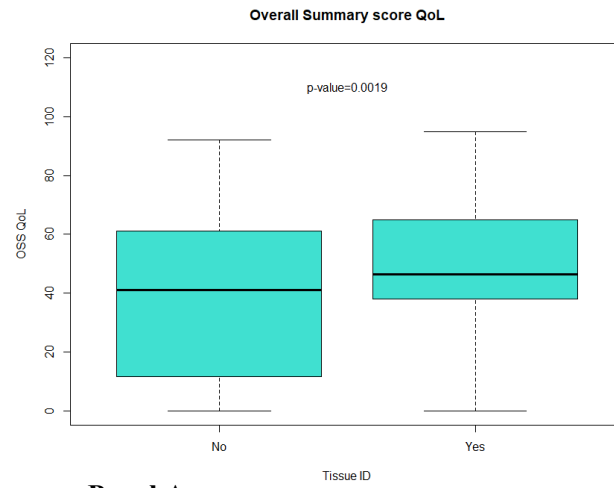

**Panel A**

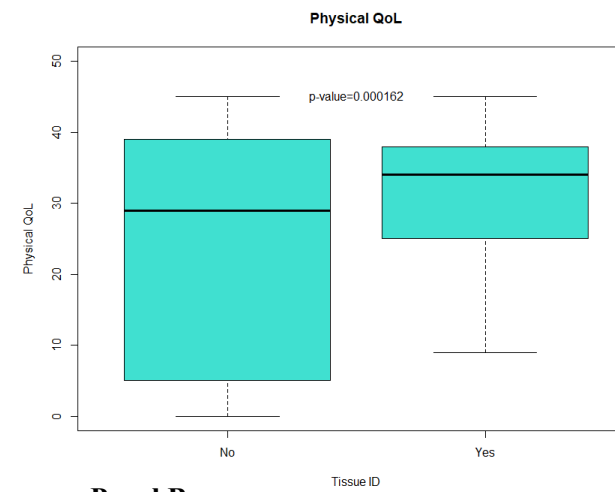

**Panel B**

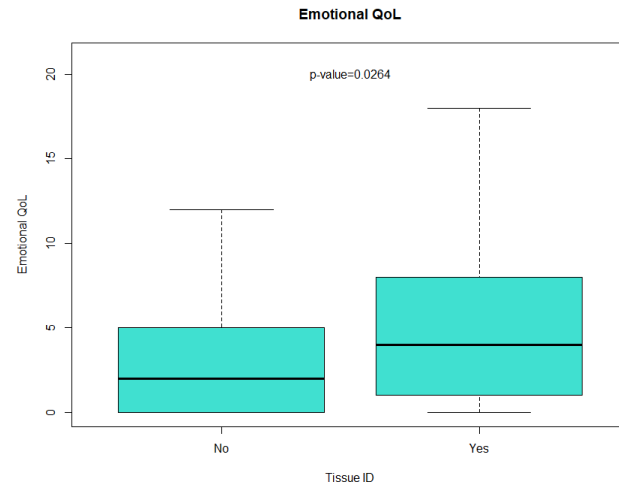

**Panel C**

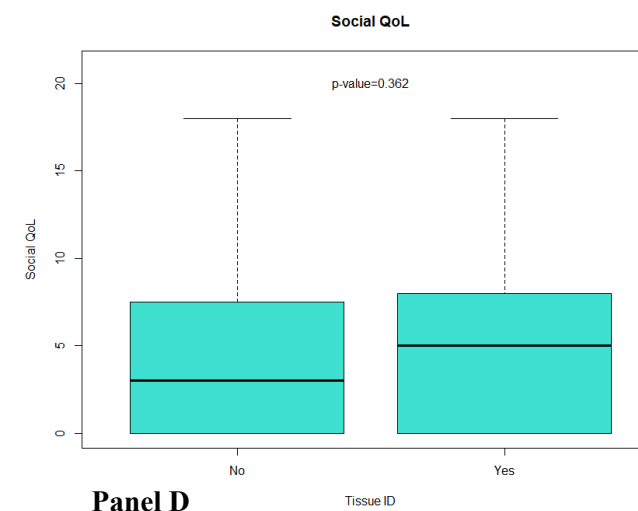

**Panel D**

**Figure S2. Panel A.** Boxplots showing the mean and standard deviation of the overall summary score (**Panel A**) and the physical (**Panel B**), emotional (**Panel C**) and social (**Panel D**) dimension scores of the Minnesota Living with Heart Failure Questionnaire (higher scores meaning worse global QoL) according to the presence of tissue ID (Tissue ID [+]) or absence (Tissue ID [-]).

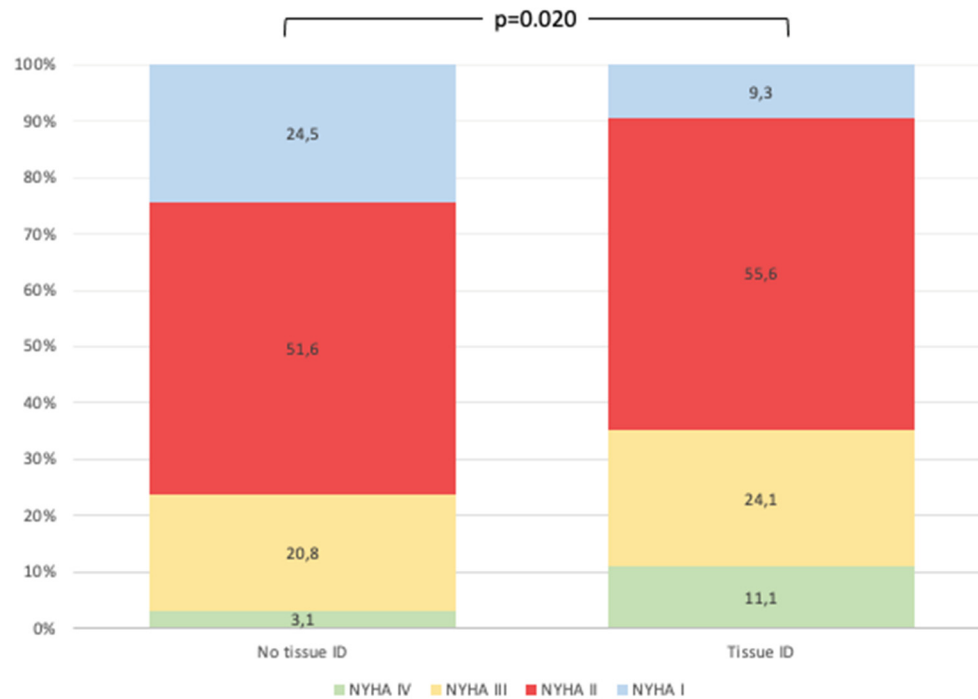

**Figure S3.** Distribution of patients according to NYHA and impairment in submaximal exercise capacity (defined as 6MWT distance<300 meters) according to tissue ID status.
